# Supplementary figures and images for: Acupuncture versus sham acupuncture for simple obesity: a systematic review and meta-analysis
Source: PubMed Central journal article supplement — Postgrad Med J. 2020 Feb 3;96(1134):221–7. doi: 10.1136/postgradmedj-2019-137221 (PMC7146934; doi:10.1136/postgradmedj-2019-137221), 2020-02-03

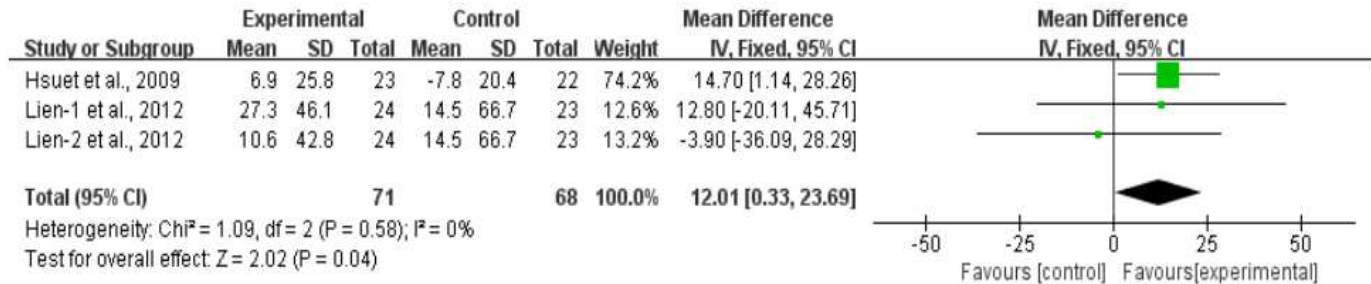

(a)

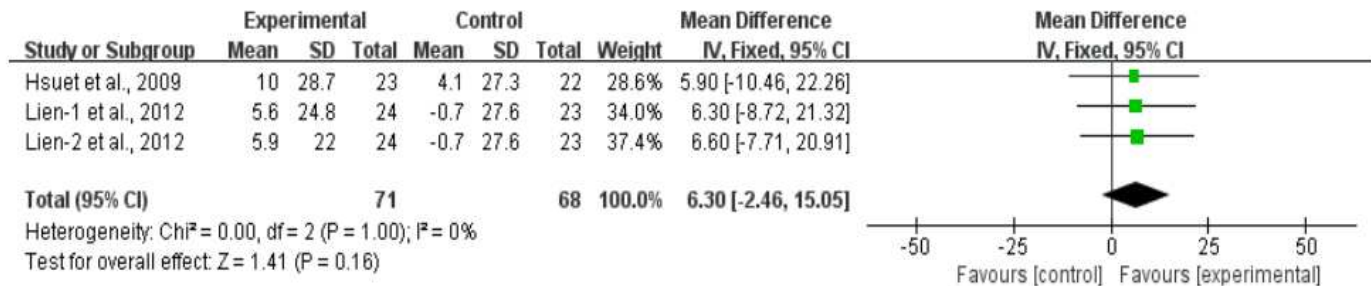

(b)

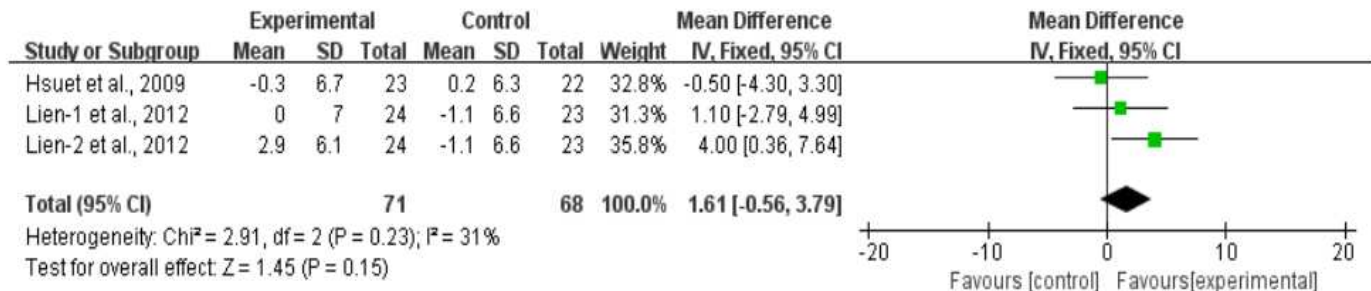

(c)

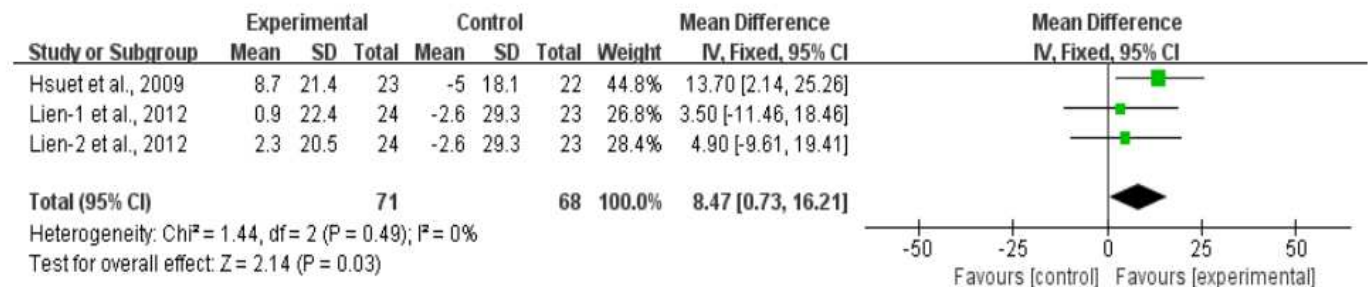

(d)

Supplement: postgradmedj-2019-137221supp001.pdf [file postgradmedj-2019-137221supp001.pdf]
